# Supplementary material
Source: ML conference proceedings conference paper supplement (https://openreview.net/forum?id=FQoZ1jXISwC)

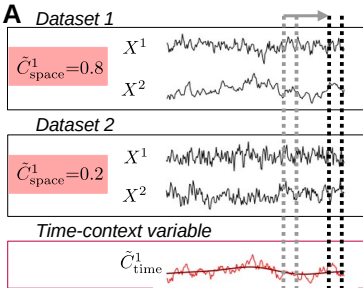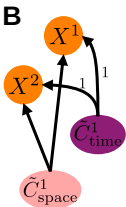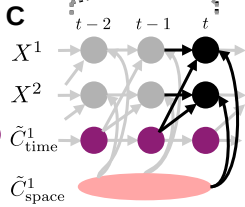

Supplement: supplementary_material [file attachment]

$t - 3$  $t - 2$  $t - 1$  $t$ No time  
dependence $D_{space}$  $D_{time}$  $X^1$  $X^2$  $C^1_{time}$  $C^1_{space}$ 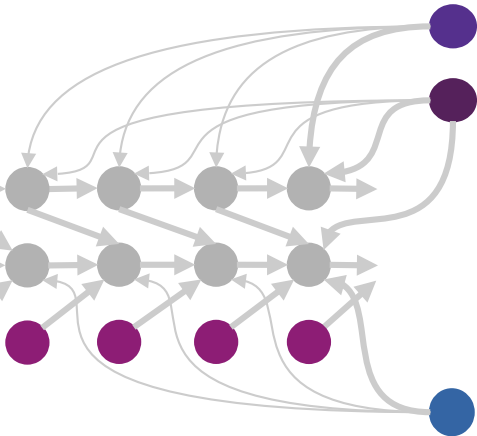

Supplement: supplementary_material [file attachment]
